# Supplementary material for: Perioperative Prevention of Venous Thromboembolism in Abdominal Surgery Patients Based on the Caprini or the Padua Risk Score—A Single Centre Prospective Observational Study
Source: MDPI journal article supplement (doi:10.3390/life12111843), 2022-11-11
Supplement: s1 [file s1]

**Table S1.** Benign diagnoses as reasons for abdominal surgery in our cohort.

| <b>Benign diagnosis/Nr of patients</b>          | <b>Total: 121</b> |
|-------------------------------------------------|-------------------|
| Cholecystolithiasis                             | 43 (35,5%)        |
| Polyp of the gallbladder                        | 3 (2,5%)          |
| Hernias (inguinal, postoperative and umbilical) | 41 (33,9%)        |
| Occlusion of stomata                            | 6 (5,0%)          |
| Stenosis of ileum because of IBD                | 2 (1,7%)          |
| Perianal fistula                                | 3 (2,5%)          |
| Other                                           | 25 (20,7%)        |

**Table S2.** Malignant diagnoses as reasons for abdominal surgery in our cohort.

| <b>Malignant diagnosis/Nr of patients</b>  | <b>Total: 96</b> |
|--------------------------------------------|------------------|
| Adenocarcinoma of colon                    | 27 (28,1%)       |
| Adenocarcinoma of rectum                   | 4 (4,2%)         |
| Adenocarcinoma or NET of pancreas          | 26 (27,1%)       |
| Adenocarcinoma, GIST or NET of stomach     | 20 (20,1%)       |
| Adenocarcinoma of gallbladder              | 3 (3,1%)         |
| Liver metastasis of colonic adenocarcinoma | 5 (5,2%)         |
| Hepatocellular carcinoma                   | 3 (3,1%)         |
| Cholangiocarcinoma                         | 4 (4,2%)         |
| Other                                      | 4 (4,2%)         |

**Table S3.** Original Caprini score questionnaire (COPD – chronic obstructive pulmonary disease, BMI – body mass index, SVT – superficial venous thrombosis, DVT- deep venous thrombosis, PE – pulmonary embolism) [Caprini JA. Thrombosis risk assessment as a guide to quality patient care. Dis Mon. 2005 Feb-Mar;51(2-3):70-8. doi: 10.1016/j.disamonth.2005.02.003.]

**Risk factors adding 1 point each:**

Age 41-60 years.  
 Minor surgery planned.  
 History of prior major surgery.  
 Varicose veins.  
 History of inflammatory bowel disease.  
 Swollen legs (current).  
 Obesity (BMI >30).  
 Acute myocardial infarction (<1 month).  
 Congestive heart failure (<1 month).  
 Sepsis (<1 month).  
 Serious lung disease incl.  
 Pneumonia (<1 month).  
 Abnormal pulmonary function (COPD).  
 Medical patient currently at bed rest.  
 Leg plaster cast or brace.  
 Other risk factors.

**Risk factors adding 2 points each:**

Age 60-74 years.  
 Major surgery (>60 minutes).  
 Arthroscopic surgery (>60 minutes).  
 Laparoscopic surgery (>60 minutes).  
 Previous malignancy.  
 Central venous access.

**Risk factors adding 3 points each:**

Age over 75 years.  
 Major surgery lasting 2-3 hours.  
 BMI >50 (venous stasis syndrome).  
 History of SVT, DVT/PE.  
 Family history of DVT/PE.  
 Present cancer or chemotherapy.  
 Positive Factor V Leiden.  
 Positive Prothrombin 20210A.  
 Elevated serum homocysteine.  
 Positive Lupus anticoagulant.  
 Elevated anticardiolipin antibodies.  
 Heparin-induced thrombocytopenia.

**Risk factors adding 5 points each:**

Elective major lower extremity arthroplasty.  
 Hip, pelvis or leg fracture (<1 month).  
 Stroke (<1 month).  
 Multiple trauma (<1 month).  
 Acute spinal cord injury (paralysis) (<1 month).  
 Major surgery lasting over 3 hours.

**Risk factors for women, adding 1 point each:**

Oral contraceptives or hormone replacement therapy.  
 Pregnancy or postpartum (<1 month).  
 History of unexplained stillborn infant, recurrent spontaneous abortion ( $\geq 3$ ), premature birth with toxemia or growth-restricted infant.

**Table S4.** The Padua score questionnaire (BMI- body mass index) [Barbar S, Noventa F, Rossetto V, Ferrari A, Brandolin B, Perlati M, De Bon E, Tormene D, Pagnan A, Prandoni P. A risk assessment model for the identification of hospitalized medical patients at risk for venous thromboembolism: the Padua Prediction Score. J Thromb Haemost. 2010 Nov; 8(11):2450-7. doi: 10.1111/j.1538-7836.2010.04044.x.

| <b>Risk factors and corresponding points:</b>                    |   |
|------------------------------------------------------------------|---|
| Active cancer                                                    | 3 |
| Previous VTE (with the exclusion of superficial vein thrombosis) | 3 |
| Reduced mobility                                                 | 3 |
| Already known thrombophilic condition                            | 3 |
| Recent ( $\leq 1$ month) trauma and/or surgery                   | 2 |
| Elderly age ( $\geq 70$ years)                                   | 1 |
| Heart and/or respiratory failure                                 | 1 |
| Acute myocardial infarction or ischemic stroke                   | 1 |
| Acute infection and/or rheumatologic disorder                    | 1 |
| Obesity (BMI $\geq 30$ )                                         | 1 |
| Ongoing hormonal treatment                                       | 1 |
